# Supplementary material for: Transcriptomic and Physiological Responses of Chlorella pyrenoidosa during Exposure to 17α-Ethinylestradiol
Source: MDPI journal article supplement (doi:10.3390/ijms23073583), 2022-03-25
Supplement: s1 [file s1]

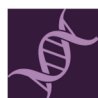

Supplementary Material

# Transcriptomic and Physiological Responses of *Chlorella pyrenoidosa* during Exposure to 17 $\alpha$ -Ethinylestradiol

## Annexed Table

| Table Captions:  |                                                                                                                                                                                                                                                               |
|------------------|---------------------------------------------------------------------------------------------------------------------------------------------------------------------------------------------------------------------------------------------------------------|
| Table S1.        | Formulae and terms used in the analysis of the O-J-I-P fluorescence-induction dynamics curve.                                                                                                                                                                 |
| Table S2.        | Variance of ABS/RC, RC/CS <sub>0</sub> , ET <sub>0</sub> /ABS, $\psi_0$ , RC/CS <sub>0</sub> , DI <sub>0</sub> /RC, ET <sub>0</sub> /RC, and TR <sub>0</sub> /RC in response to exposure time under at different 17 $\alpha$ -EE <sub>2</sub> concentrations. |
| Table S3.        | The lists of primers used in real-time-quantitative PCR.                                                                                                                                                                                                      |
| Table S4.        | The Lists of DEGs belonging to different pathways in the LD, MD, and HD groups.                                                                                                                                                                               |
| Figure captions: |                                                                                                                                                                                                                                                               |
| Fig. S1          | The transcript abundance of genes related to <i>psaD</i> , <i>sodA</i> , and <i>por</i> in cultures of <i>C. pyrenoidosa</i> exposure to 17 $\alpha$ -EE <sub>2</sub> .                                                                                       |
| Fig. S2          | Scatter plots of KEGG enrichment pathway in the LD, MD, and HD groups.                                                                                                                                                                                        |
| Fig. S3          | KEGG-annotated changes in gene expression for photosynthesis pathways in the LD group.                                                                                                                                                                        |
| Fig. S4          | KEGG-annotated changes in gene expression for oxidative phosphorylation pathways in the LD group.                                                                                                                                                             |
| Fig. S5          | KEGG-annotated changes in gene expression for ribosome biogenesis in eukaryotes pathways in the LD group.                                                                                                                                                     |
| Fig. S6          | KEGG-annotated changes in gene expression for ribosome biogenesis in eukaryotes pathways in the MD group.                                                                                                                                                     |
| Fig. S7          | KEGG-annotated changes in gene expression for pyrimidine metabolism pathways in the MD group.                                                                                                                                                                 |
| Fig. S8          | KEGG-annotated changes in gene expression for porphyrin and chlorophyll metabolism pathways in the MD group.                                                                                                                                                  |
| Fig. S9          | KEGG-annotated changes in gene expression for nitrogen metabolism pathways in the MD group.                                                                                                                                                                   |
| Fig. S10         | KEGG-annotated changes in gene expression for DNA replication pathways in the MD group.                                                                                                                                                                       |
| Fig. S11         | KEGG-annotated changes in gene expression for DNA replication pathways in the HD group.                                                                                                                                                                       |
| Fig. S12         | KEGG-annotated changes in gene expression for mismatch repair pathways in the HD group.                                                                                                                                                                       |
| Fig. S13         | KEGG-annotated changes in gene expression for homologous recombination pathways in the HD group.                                                                                                                                                              |

**Table S1.** Formulae and terms used in the analysis of the O-J-I-P fluorescence-induction dynamics curve.

| Formulae and Terms                     | Illustrations                                                                                                          |
|----------------------------------------|------------------------------------------------------------------------------------------------------------------------|
| O-step, K-step, J-step, I-step, P-step | Fluorescence intensity at t=50 $\mu$ s, 30 $\mu$ s, 2 ms, 30 ms, and the highest peak of fluorescence, respectively    |
| ABS/RC                                 | Light energy absorbed per unit reaction center                                                                         |
| Fv/Fm                                  | The maximum quantum yield for primary photochemistry                                                                   |
| ET <sub>0</sub> /ABS                   | Quantum yield for electron transport (at t=0)                                                                          |
| $\psi_0$                               | Probability that a trapped exciton moves an electron into the electron transport chain beyond QA <sup>-</sup> (at t=0) |
| RC/CS <sub>0</sub>                     | Density of RCs (QA-reducing PSII reaction centers)                                                                     |
| DI <sub>0</sub> /RC                    | Dissipated energy flux per RC (at t=0)                                                                                 |
| ET <sub>0</sub> /RC                    | Electron transport flux per RC (at t=0)                                                                                |
| TR <sub>0</sub> /RC                    | Trapped energy flux per RC (at t=0)                                                                                    |

**Table S2.** Variance of ABS/RC, TR<sub>0</sub>/RC, ET<sub>0</sub>/RC, DI<sub>0</sub>/RC, Fv/Fm, RC/CS<sub>0</sub>,  $\psi_0$ , and ET<sub>0</sub>/ABS in response to exposure time under different 17 $\alpha$ -EE<sub>2</sub> concentrations. Values represent mean  $\pm$  standard error. The letters (a–f) indicate homogeneity of different treatments (P < 0.05).

| Photosynthetic Parameters | Time (h) | CK                  | LD                  | MD                 | HD                  |
|---------------------------|----------|---------------------|---------------------|--------------------|---------------------|
| ABS/RC                    | 24       | 2.52 $\pm$ 0.022a   | 2.64 $\pm$ 0.054c   | 2.55 $\pm$ 0.022ab | 2.60 $\pm$ 0.021bc  |
|                           | 48       | 3.63 $\pm$ 0.601a   | 3.37 $\pm$ 0.036a   | 3.36 $\pm$ 0.024a  | 3.46 $\pm$ 0.055a   |
|                           | 72       | 2.99 $\pm$ 0.037a   | 2.92 $\pm$ 0.023a   | 2.94 $\pm$ 0.041a  | 3.00 $\pm$ 0.075a   |
|                           | 96       | 3.14 $\pm$ 0.008a   | 3.07 $\pm$ 0.018b   | 3.07 $\pm$ 0.016b  | 3.14 $\pm$ 0.040a   |
| TR <sub>0</sub> /RC       | 24       | 1.59 $\pm$ 0.003a   | 1.66 $\pm$ 0.043b   | 1.64 $\pm$ 0.015b  | 1.59 $\pm$ 0.020a   |
|                           | 48       | 2.33 $\pm$ 0.052a   | 2.35 $\pm$ 0.014a   | 2.33 $\pm$ 0.024a  | 2.37 $\pm$ 0.041a   |
|                           | 72       | 2.20 $\pm$ 0.029a   | 2.16 $\pm$ 0.013a   | 2.15 $\pm$ 0.028a  | 2.14 $\pm$ 0.036a   |
|                           | 96       | 1.59 $\pm$ 0.022a   | 1.66 $\pm$ 0.011b   | 1.64 $\pm$ 0.010bb | 1.59 $\pm$ 0.033b   |
| ET <sub>0</sub> /RC       | 24       | 0.70 $\pm$ 0.007a   | 0.72 $\pm$ 0.016a   | 0.69 $\pm$ 0.020a  | 0.62 $\pm$ 0.005b   |
|                           | 48       | 1.14 $\pm$ 0.044a   | 1.11 $\pm$ 0.005a   | 1.03 $\pm$ 0.055b  | 0.96 $\pm$ 0.026c   |
|                           | 72       | 0.95 $\pm$ 0.009a   | 1.02 $\pm$ 0.014b   | 0.99 $\pm$ 0.029ab | 1.01 $\pm$ 0.053b   |
|                           | 96       | 0.70 $\pm$ 0.009a   | 0.72 $\pm$ 0.017b   | 0.69 $\pm$ 0.050b  | 0.62 $\pm$ 0.067a   |
| DI <sub>0</sub> /RC       | 24       | 0.92 $\pm$ 0.018a   | 0.97 $\pm$ 0.018b   | 0.91 $\pm$ 0.020a  | 1.01 $\pm$ 0.010c   |
|                           | 48       | 1.30 $\pm$ 0.566a   | 1.02 $\pm$ 0.052a   | 1.02 $\pm$ 0.040a  | 1.10 $\pm$ 0.209a   |
|                           | 72       | 0.79 $\pm$ 0.027a   | 0.77 $\pm$ 0.013a   | 0.79 $\pm$ 0.029a  | 0.86 $\pm$ 0.039b   |
|                           | 96       | 0.92 $\pm$ 0.022a   | 0.97 $\pm$ 0.013a   | 0.91 $\pm$ 0.023a  | 1.01 $\pm$ 0.015b   |
| Fv/Fm                     | 24       | 0.63 $\pm$ 0.004a   | 0.63 $\pm$ 0.006a   | 0.64 $\pm$ 0.006b  | 0.61 $\pm$ 0.004c   |
|                           | 48       | 0.64 $\pm$ 0.104a   | 0.70 $\pm$ 0.006a   | 0.70 $\pm$ 0.005a  | 0.68 $\pm$ 0.007a   |
|                           | 72       | 0.74 $\pm$ 0.007a   | 0.74 $\pm$ 0.003a   | 0.73 $\pm$ 0.007a  | 0.71 $\pm$ 0.006b   |
|                           | 96       | 0.73 $\pm$ 0.007a   | 0.72 $\pm$ 0.003ab  | 0.72 $\pm$ 0.006b  | 0.70 $\pm$ 0.004c   |
| RC/Cso                    | 24       | 62.42 $\pm$ 3.551a  | 58.03 $\pm$ 2.610a  | 52.09 $\pm$ 1.816b | 48.523 $\pm$ 2.099b |
|                           | 48       | 128.05 $\pm$ 9.343a | 119.21 $\pm$ 2.355a | 98.54 $\pm$ 2.978b | 78.57 $\pm$ 1.616c  |
|                           | 72       | 84.67 $\pm$ 1.526a  | 86.13 $\pm$ 2.466a  | 73.44 $\pm$ 2.723b | 58.65 $\pm$ 2.972c  |
|                           | 96       | 102.65 $\pm$ 4.231a | 103.40 $\pm$ 4.691a | 89.15 $\pm$ 5.479b | 70.67 $\pm$ 4.966c  |
| $\psi_0$                  | 24       | 0.42 $\pm$ 0.005a   | 0.43 $\pm$ 0.004ab  | 0.42 $\pm$ 0.015b  | 0.39 $\pm$ 0.007c   |
|                           | 48       | 0.49 $\pm$ 0.011a   | 0.47 $\pm$ 0.004a   | 0.44 $\pm$ 0.026b  | 0.40 $\pm$ 0.016c   |
|                           | 72       | 0.46 $\pm$ 0.009a   | 0.52 $\pm$ 0.006b   | 0.51 $\pm$ 0.017b  | 0.47 $\pm$ 0.018b   |
|                           | 96       | 0.43 $\pm$ 0.008a   | 0.47 $\pm$ 0.007b   | 0.46 $\pm$ 0.024b  | 0.47 $\pm$ 0.034a   |
| ET <sub>0</sub> /ABS      | 24       | 0.32 $\pm$ 0.004a   | 0.35 $\pm$ 0.001a   | 0.34 $\pm$ 0.010a  | 0.34 $\pm$ 0.003b   |
|                           | 48       | 0.33 $\pm$ 0.049a   | 0.38 $\pm$ 0.004a   | 0.37 $\pm$ 0.019a  | 0.33 $\pm$ 0.012a   |
|                           | 72       | 0.33 $\pm$ 0.005a   | 0.38 $\pm$ 0.005b   | 0.37 $\pm$ 0.010b  | 0.33 $\pm$ 0.011b   |
|                           | 96       | 0.32 $\pm$ 0.003a   | 0.35 $\pm$ 0.004b   | 0.34 $\pm$ 0.015b  | 0.34 $\pm$ 0.022a   |

**Table S3.** The lists of primers used in real-time-quantitative PCR.

| Gene Name   | Forward Primers (5'-3') | Reverse Primers (5'-3') |
|-------------|-------------------------|-------------------------|
| <i>psaD</i> | GATTTTACGGCAGCAAGA-GAGC | ACAGAACGAGGGCGACCAT     |
| <i>sodA</i> | AAGGTCTACACCAC-CGAGCG   | GTGCCTTTCGGATTTCGTTG    |
| <i>por</i>  | CTTCTTT-GCCCTCTCTGGTGTG | TACGACCTTCTCGCCCTTCTT   |
| <i>18s</i>  | CAGCCTGCTAAA-TAGTCACGG  | CAGAACATCTAAGGGCATCACA  |

Abbreviation: *psaD*, Photosystem I P700 chlorophyll a apoprotein A2; *sodA*, manganese superoxide dismutase; *por*, pyruvate: ferredoxin (flavodoxin) oxidoreductase.

**Table S4.** The lists of DEGs belonging to different pathways in the LD, MD, and HD groups.

| Pathway                           | Gene Name     | KO Entry | log2FC | P-Value | Description                                         |
|-----------------------------------|---------------|----------|--------|---------|-----------------------------------------------------|
| Photosynthesis                    | <i>psbA</i>   | K02703   | -3.35  | 0.00039 | Photosystem II protein D1                           |
|                                   | <i>psbB</i>   | K02704   | -2.99  | 0.00060 | Photosystem II 47 kDa protein                       |
|                                   | <i>psbC</i>   | K02705   | -3.06  | 0.00033 | Photosystem II protein                              |
|                                   | <i>psbE</i>   | K02707   | -2.57  | 0.00051 | Cytochrome b559 alpha subunit of photosystem II     |
|                                   | <i>psbI</i>   | K02710   | -2.38  | 0.00049 | Photosystem II reaction center protein              |
|                                   | <i>Psb28</i>  | K08903   | 0.55   | 0.00040 | Photosystem II reaction center psb28 chloroplastic  |
|                                   | <i>psaD</i>   | K02692   | 2.03   | 0.00041 | Photosystem I reaction center subunit chloroplastic |
|                                   | <i>petJ</i>   | K08906   | -0.21  | 0.00042 | Cytochrome c6                                       |
|                                   | <i>petB</i>   | K02635   | -3.02  | 0.00117 | Cytochrome b6 (chloroplast)                         |
|                                   | <i>petF</i>   | K02639   | -0.25  | 0.00003 | Chloroplast precursor                               |
| Oxidative phosphorylation         | <i>crtz</i>   | K15746   | -0.29  | 0.00022 | Beta-carotene hydroxylase                           |
|                                   | <i>atpA</i>   | K02111   | -3.14  | 0.00020 | ATP synthase CF1 alpha subunit                      |
|                                   | <i>atpG</i>   | K02109   | -0.03  | 0.00091 | CF0 ATP synthase subunit II precursor               |
|                                   | <i>coxI</i>   | K02256   | -2.48  | 0.00044 | Cytochrome c oxidase subunit I                      |
|                                   | <i>sodA</i>   | K04564   | 2.13   | 0.00889 | Manganese superoxide dismutase                      |
|                                   | <i>por</i>    | K02956   | 1.17   | 0.00004 | Pyruvate:ferredoxin (flavodoxin) oxidoreductase     |
| Ribosome biogenesis in eukaryotes | <i>Kin14n</i> | K14565   | -1.45  | 0.00067 | P-loop containing nucleoside triphosphate hydrolase |
|                                   | <i>nita</i>   | K10534   | -2.96  | 0.00001 | Nitrate reductase                                   |
| Nitrogen metabolism               | <i>gdh2</i>   | K00261   | -2.11  | 0.00045 | Glutamate dehydrogenase                             |
| DNA replication                   | <i>mcm4</i>   | K02212   | -2.00  | 0.00032 | DNA replication licensing factor                    |
|                                   | <i>rpa1D</i>  | K07466   | -1.99  | 0.00011 | Replication A 70 kDa DNA-binding subunit B          |
| Mismatch repair                   | <i>msh1</i>   | K08737   | 1.11   | 0.00001 | DNA mismatch repair protein MSH1, mitochondrial     |
|                                   | <i>exo1</i>   | K10746   | -2.28  | 0.00003 | Exonuclease 1                                       |
|                                   | <i>mus1</i>   | K08735   | -1.56  | 0.00007 | DNA mismatch repair                                 |

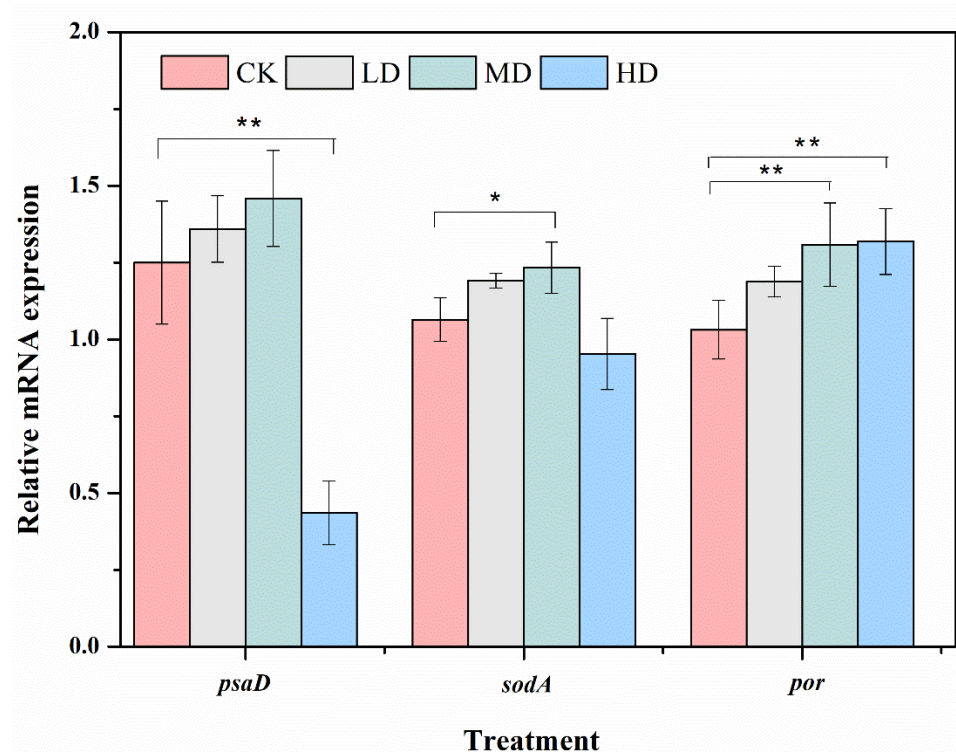

**Figure S1.** The transcript abundance of genes related to *psaD*, *sodA*, and *por* in cultures of *C. pyrenoidosa* exposed to 17 $\alpha$ -EE<sub>2</sub>. Error bars indicate mean  $\pm$  SE. (\*) and (\*\*) represent statistically significant differences with respect to the values of control cultures at p < 0.05 and at p < 0.01 levels, respectively.

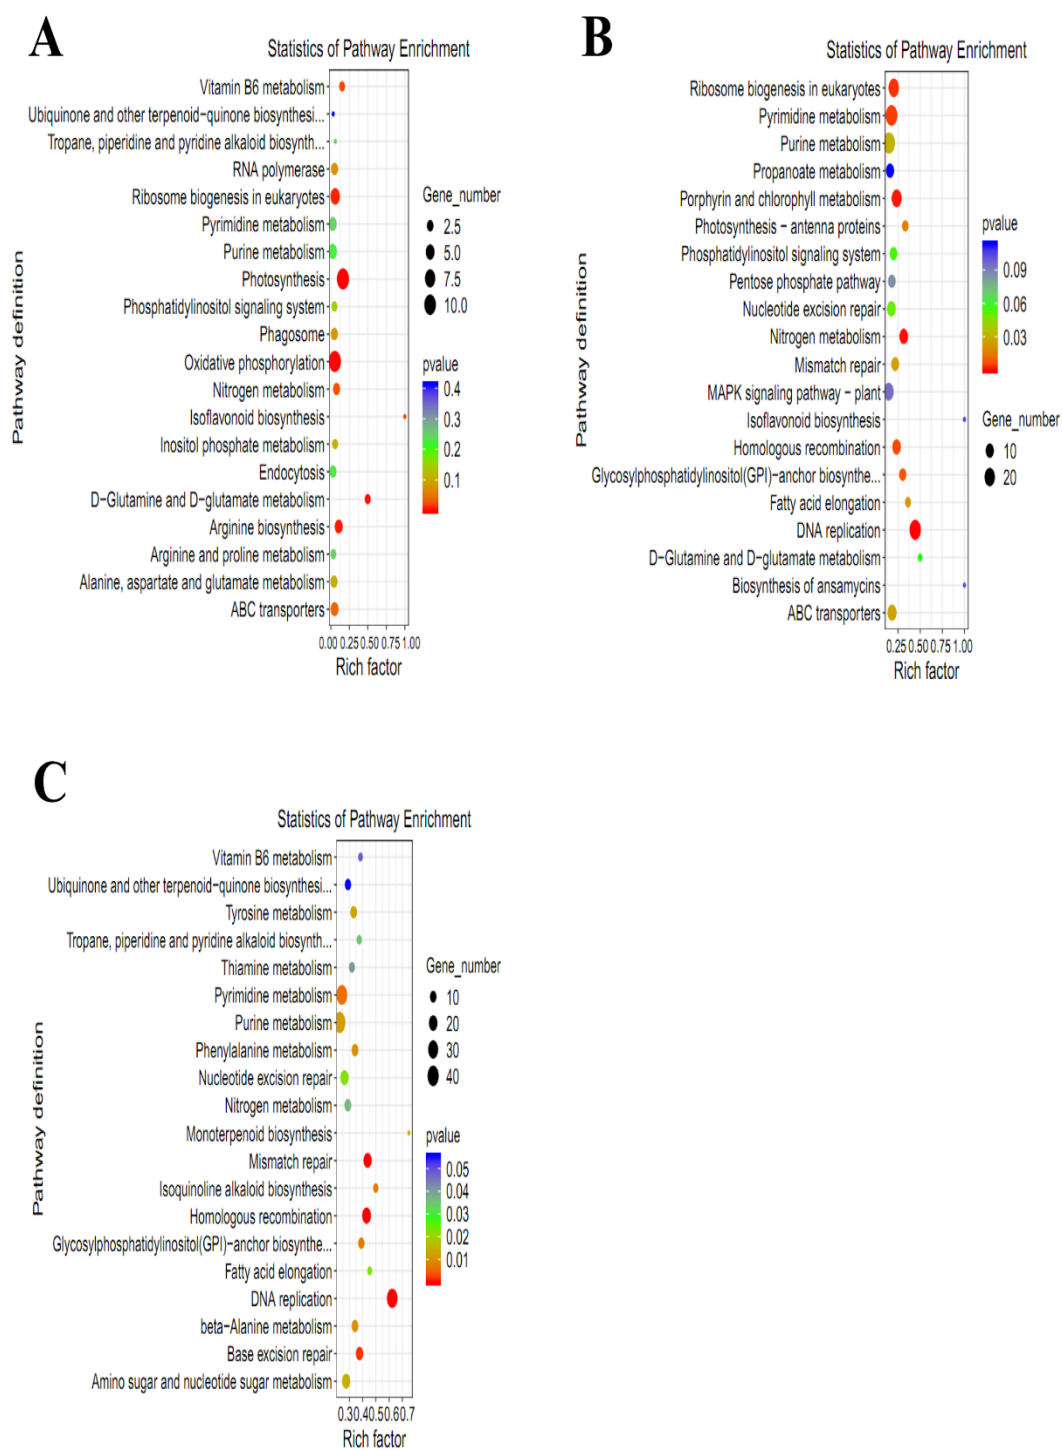

**Figure S2.** Scatter plots of KEGG enrichment pathway in the LD (A), MD (B), and HD (C) groups.

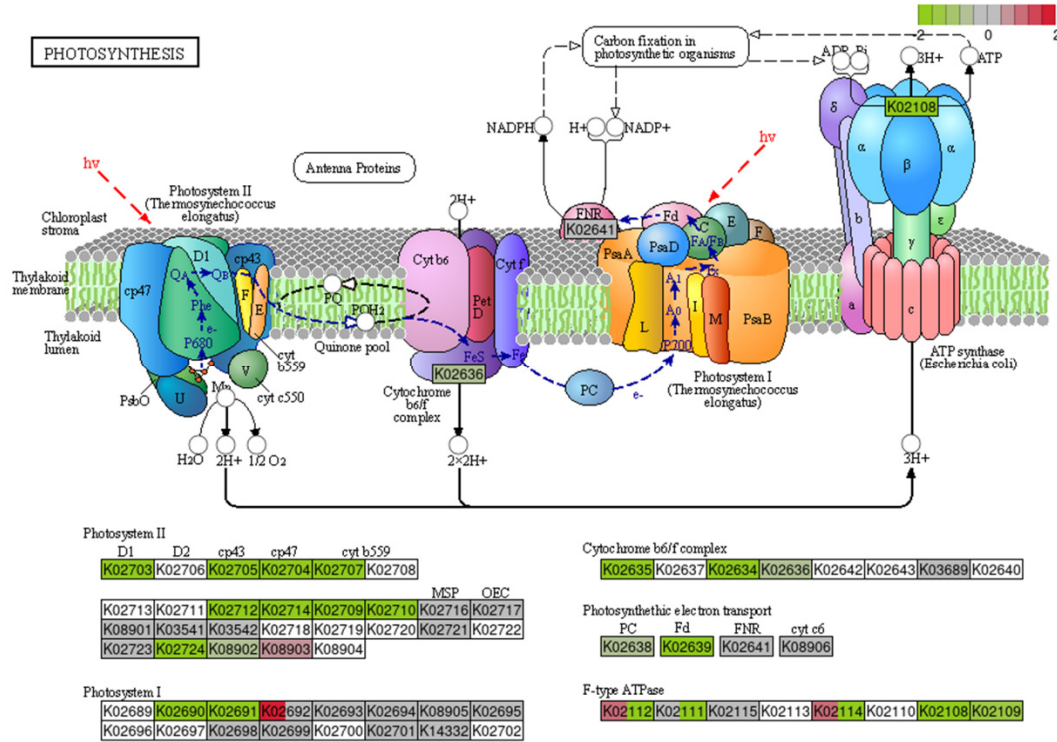

**Figure S3.** KEGG-annotated changes in gene expression for photosynthesis pathways in the LD group (red square: compared with CK, significantly up-regulated in LD; green square: compared with CK, significantly down-regulated in LD).

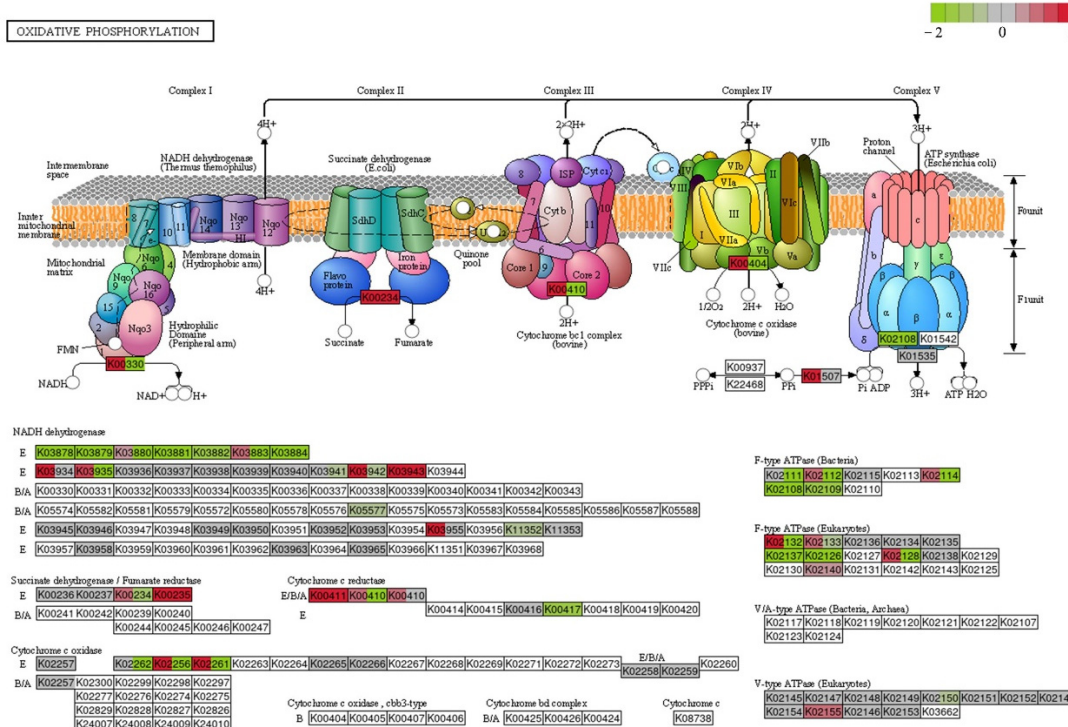

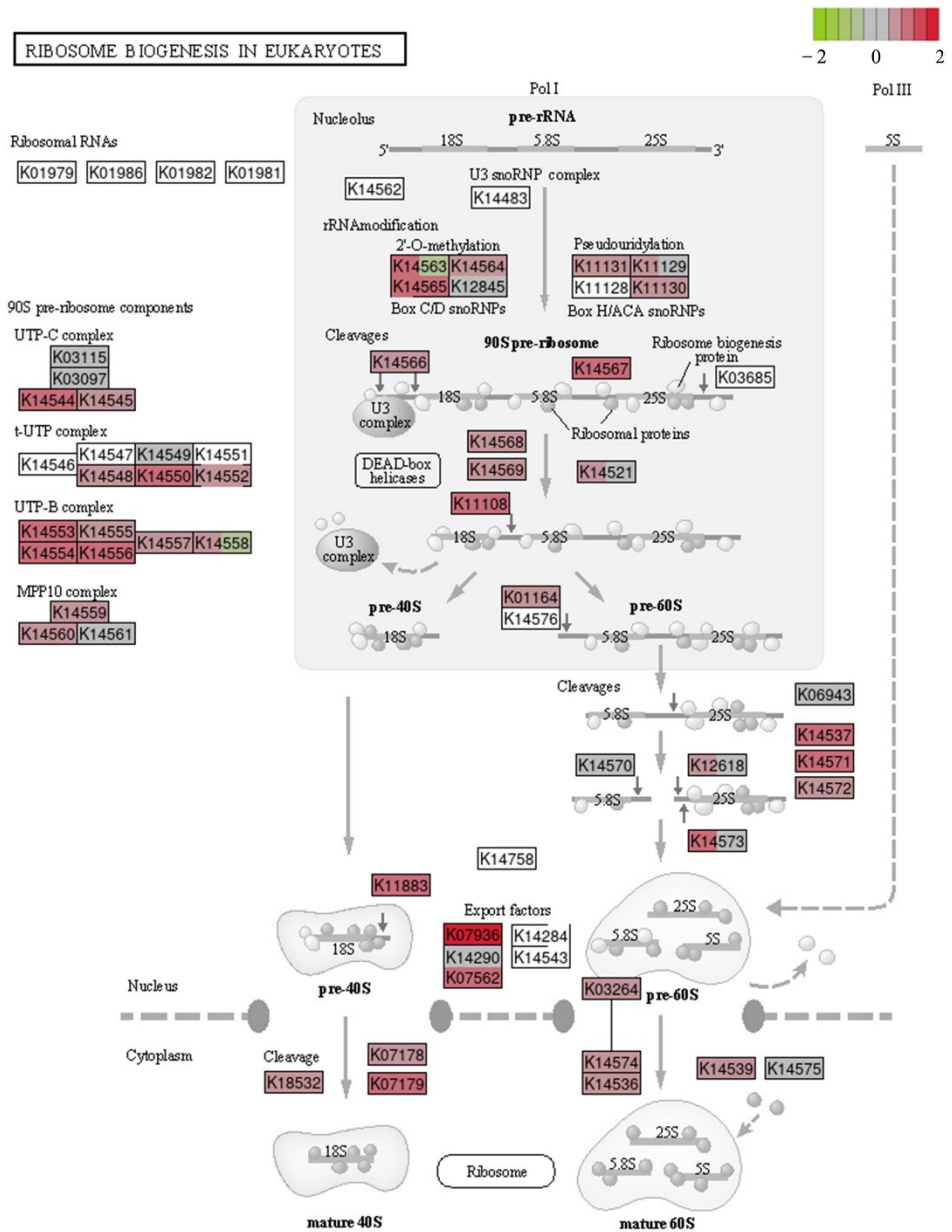

**Figure S5.** KEGG-annotated changes in gene expression for ribosome biogenesis in eukaryotes pathways in the LD group (red square: compared with CK, significantly up-regulated in LD; green square: compared with CK, significantly down-regulated in LD).







Metabolic map of chlorophyll metabolism in *Arabidopsis thaliana*. The map illustrates the biosynthetic pathways for various chlorophylls, including Chlorophyll a, Chlorophyll b, and Chlorophyll c. Key intermediates include Protochlorophyllide, Prochlorophyllide, and various chlorophyll precursors. The map is color-coded by gene family, with a legend at the top right showing a color scale from -2 (green) to 2 (red).

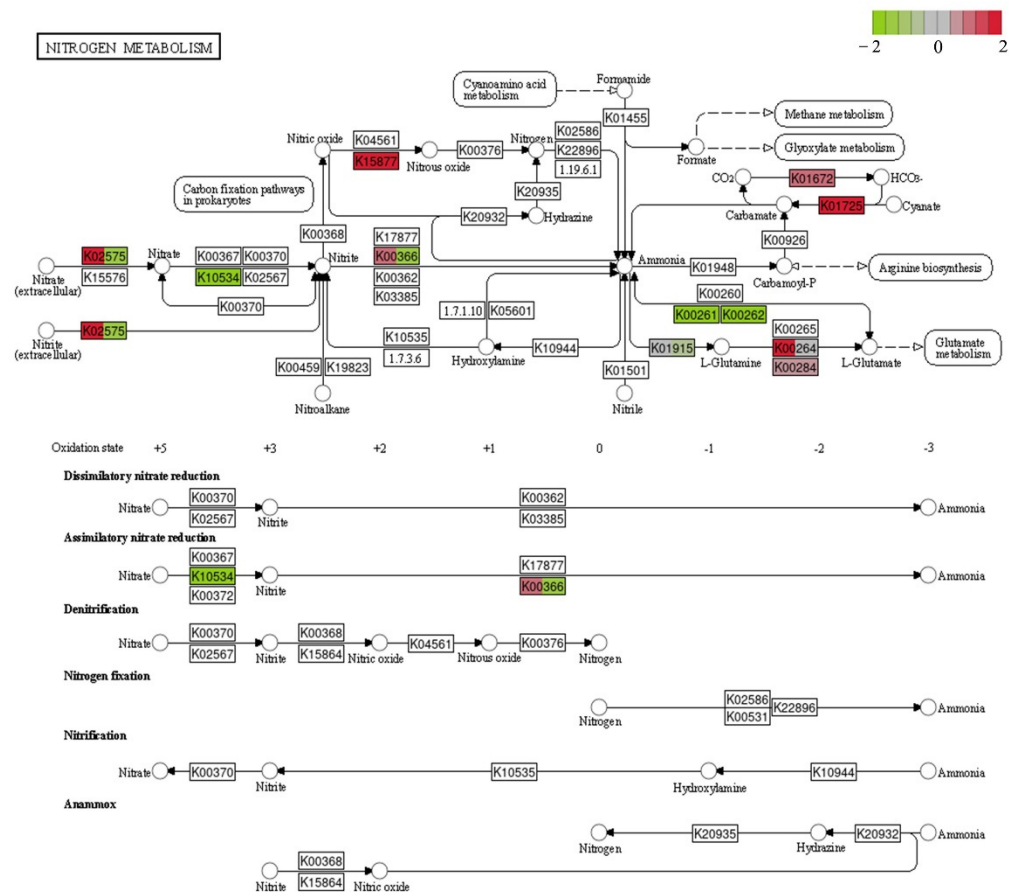

**Figure S9.** KEGG-annotated changes in gene expression for nitrogen metabolism pathways in the MD group (red square: compared with CK, significantly up-regulated in MD; green square: compared with CK, significantly down-regulated in MD).

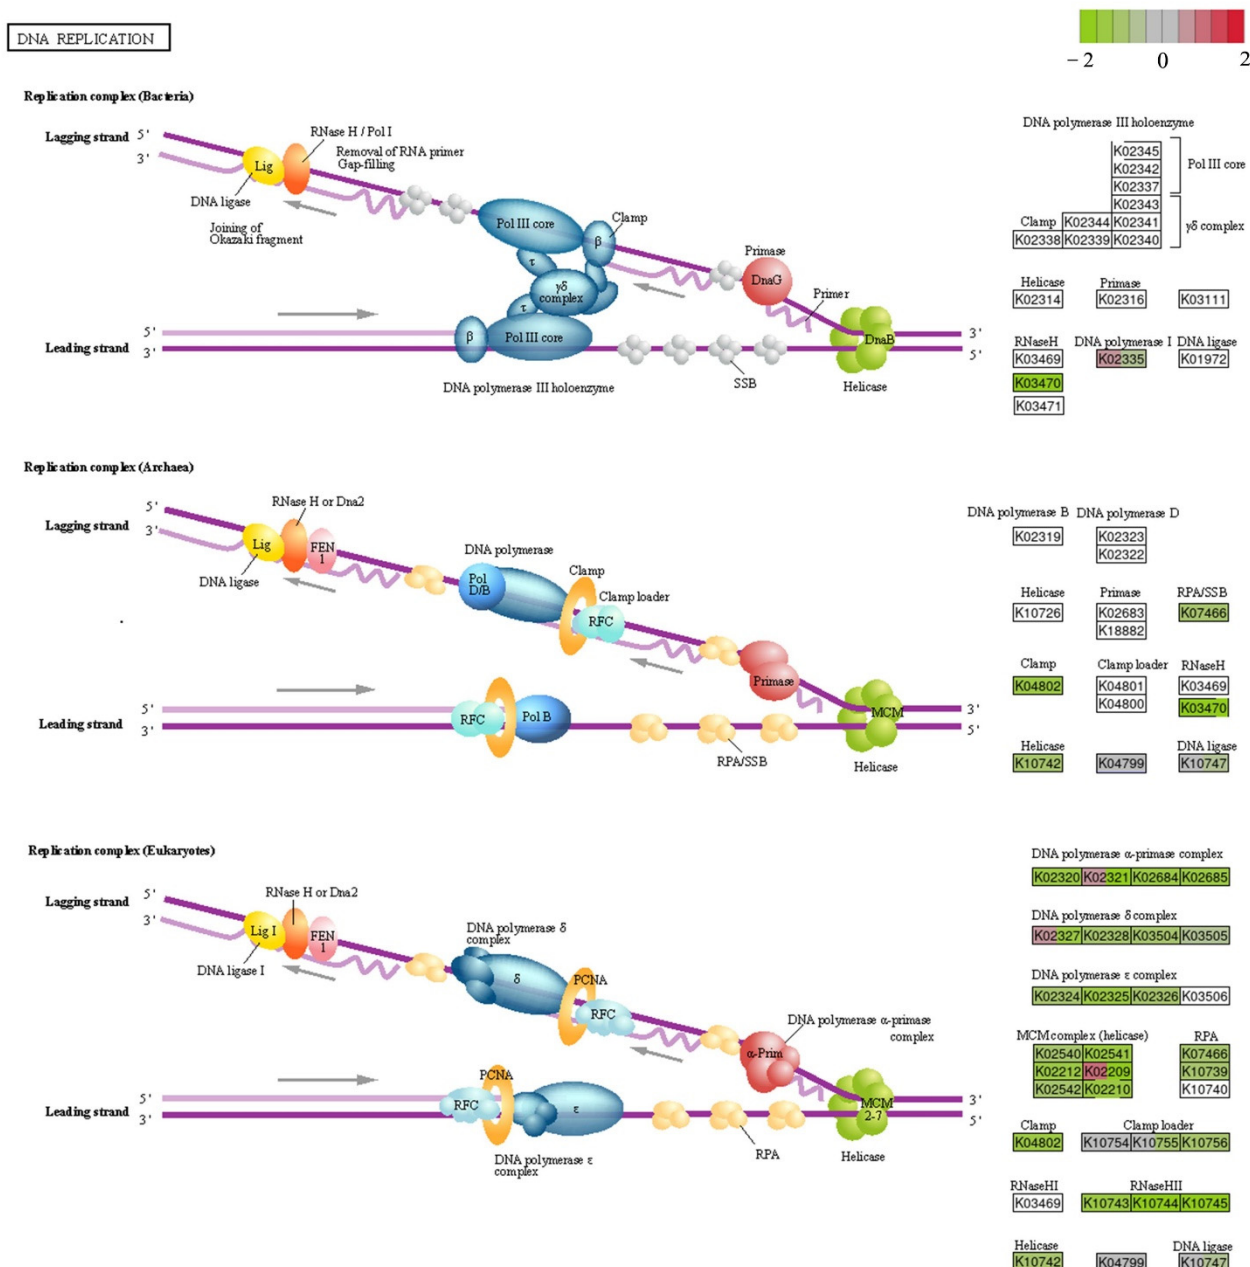

**Figure S10.** KEGG-annotated changes in gene expression for DNA replication pathways in the MD group (red square: compared with CK, significantly up-regulated in MD; green square: compared with CK, significantly down-regulated in MD).

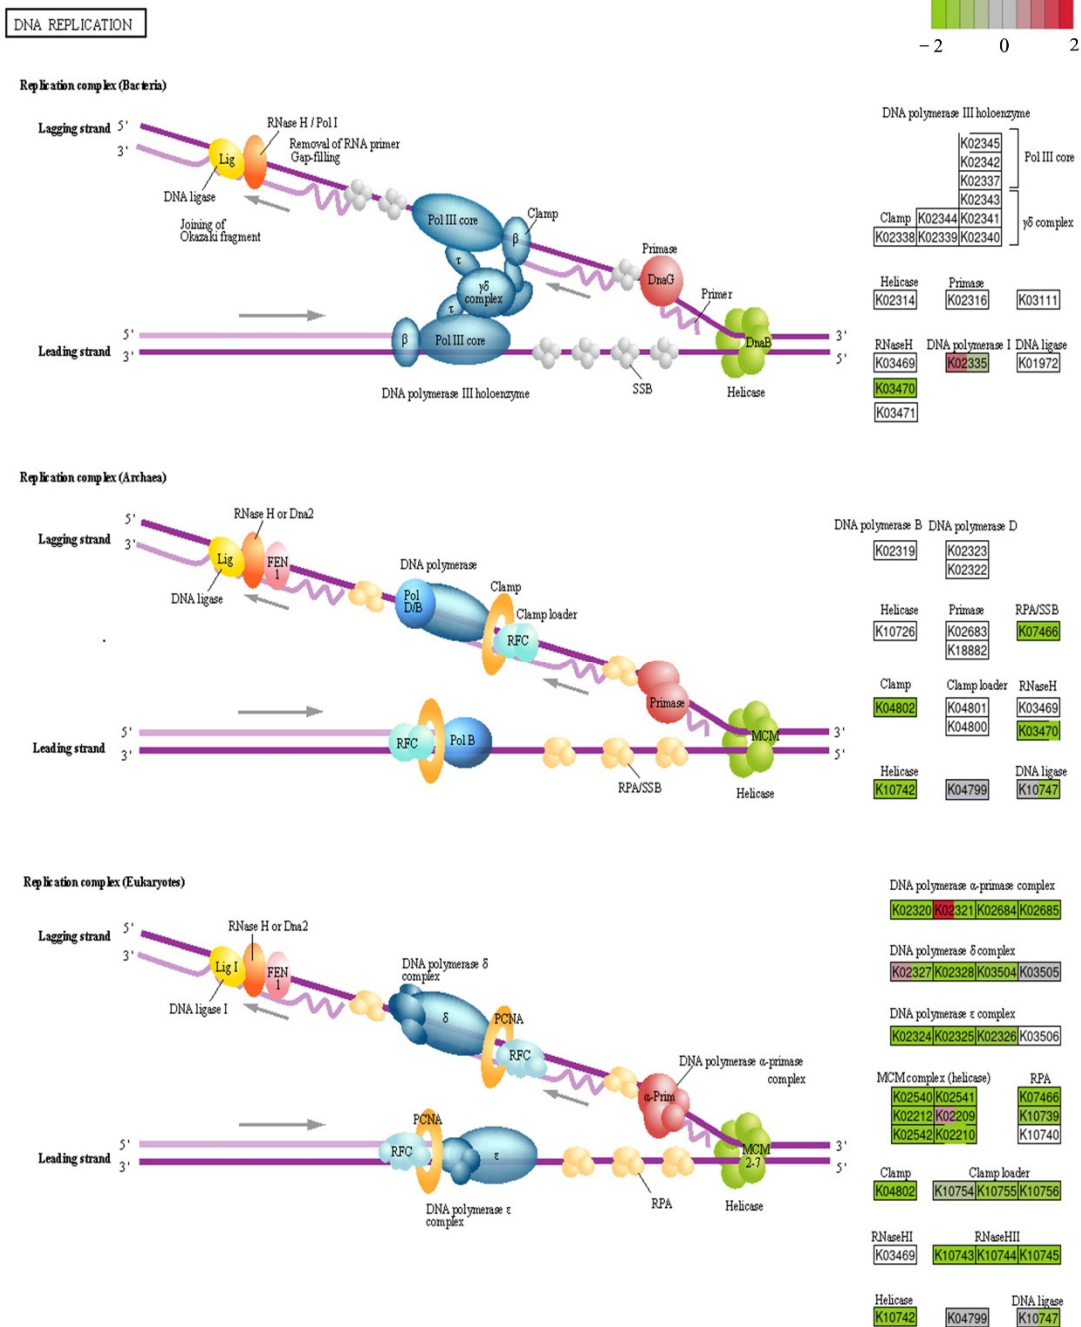

**Figure S11.** KEGG-annotated changes in gene expression for DNA replication pathways in the HD group (red square: compared with CK, significantly up-regulated in HD; green square: compared with CK, significantly down-regulated in HD).

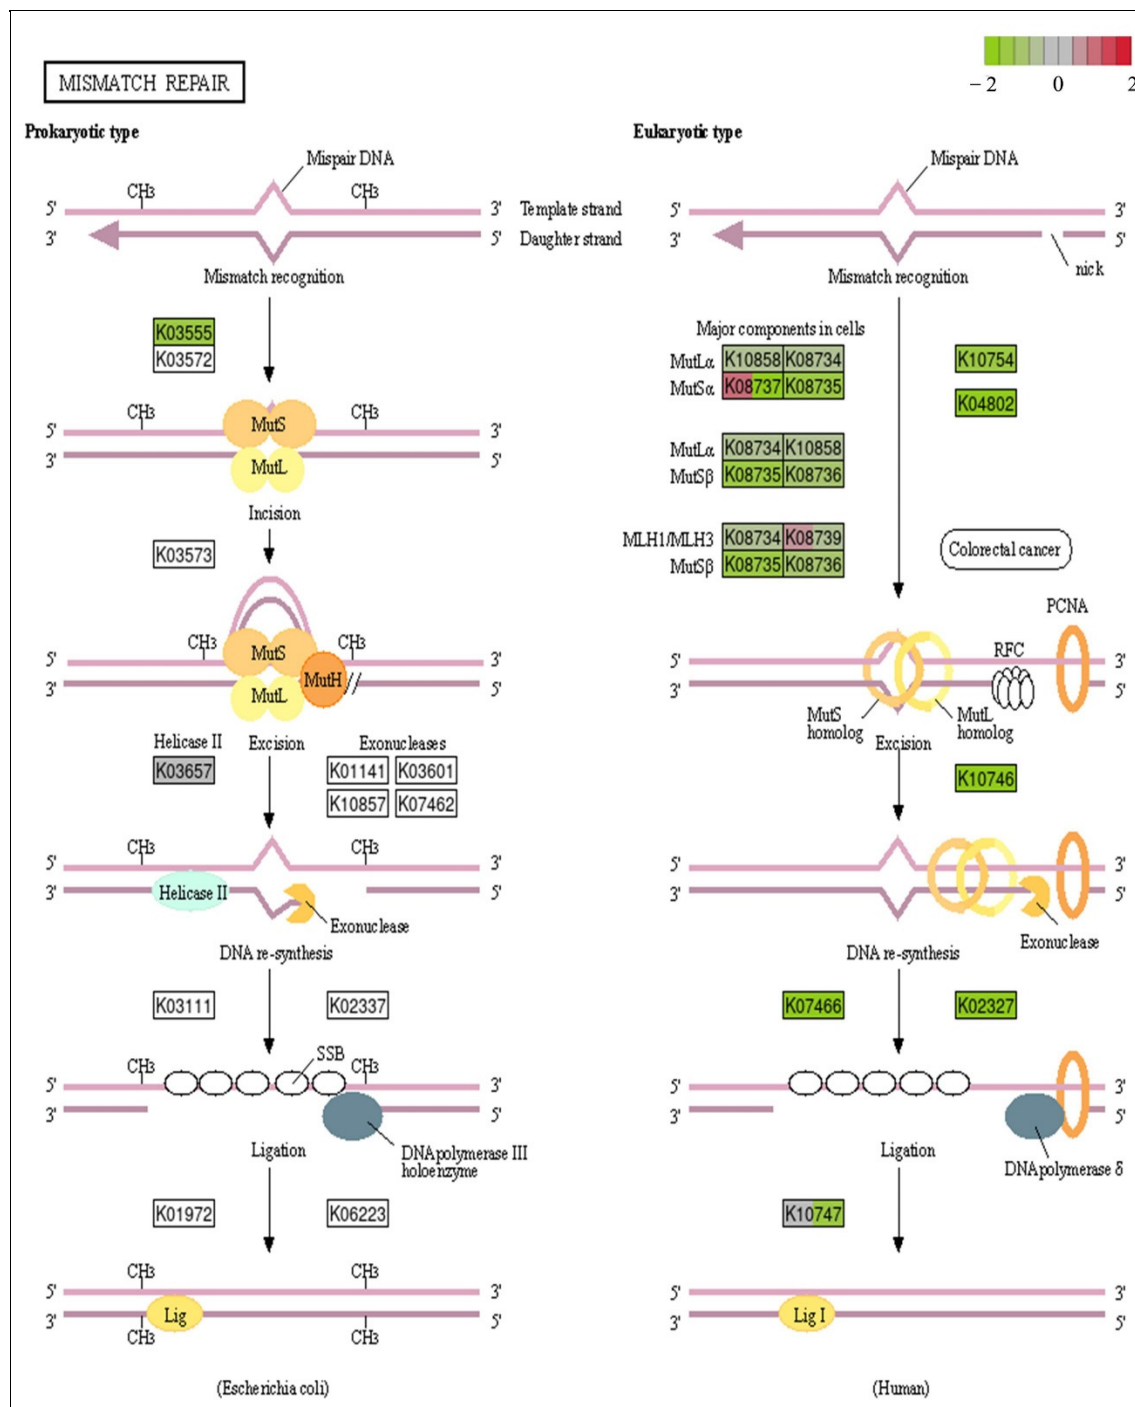

**Figure S12.** KEGG-annotated changes in gene expression for mismatch repair pathways in the HD group (red square: compared with CK, significantly up-regulated in HD; green square: compared with CK, significantly down-regulated in HD).
